# Supplementary material for: Causal association between placental growth factor and coronary heart disease: a Mendelian randomization study
Source: PubMed Central journal article supplement (PMC10599727; doi:10.18632/aging.205061), 2023-10-02
Supplement: aging-15-205061-s001.pdf [file aging-15-205061-s001.pdf]

## SUPPLEMENTARY FIGURES

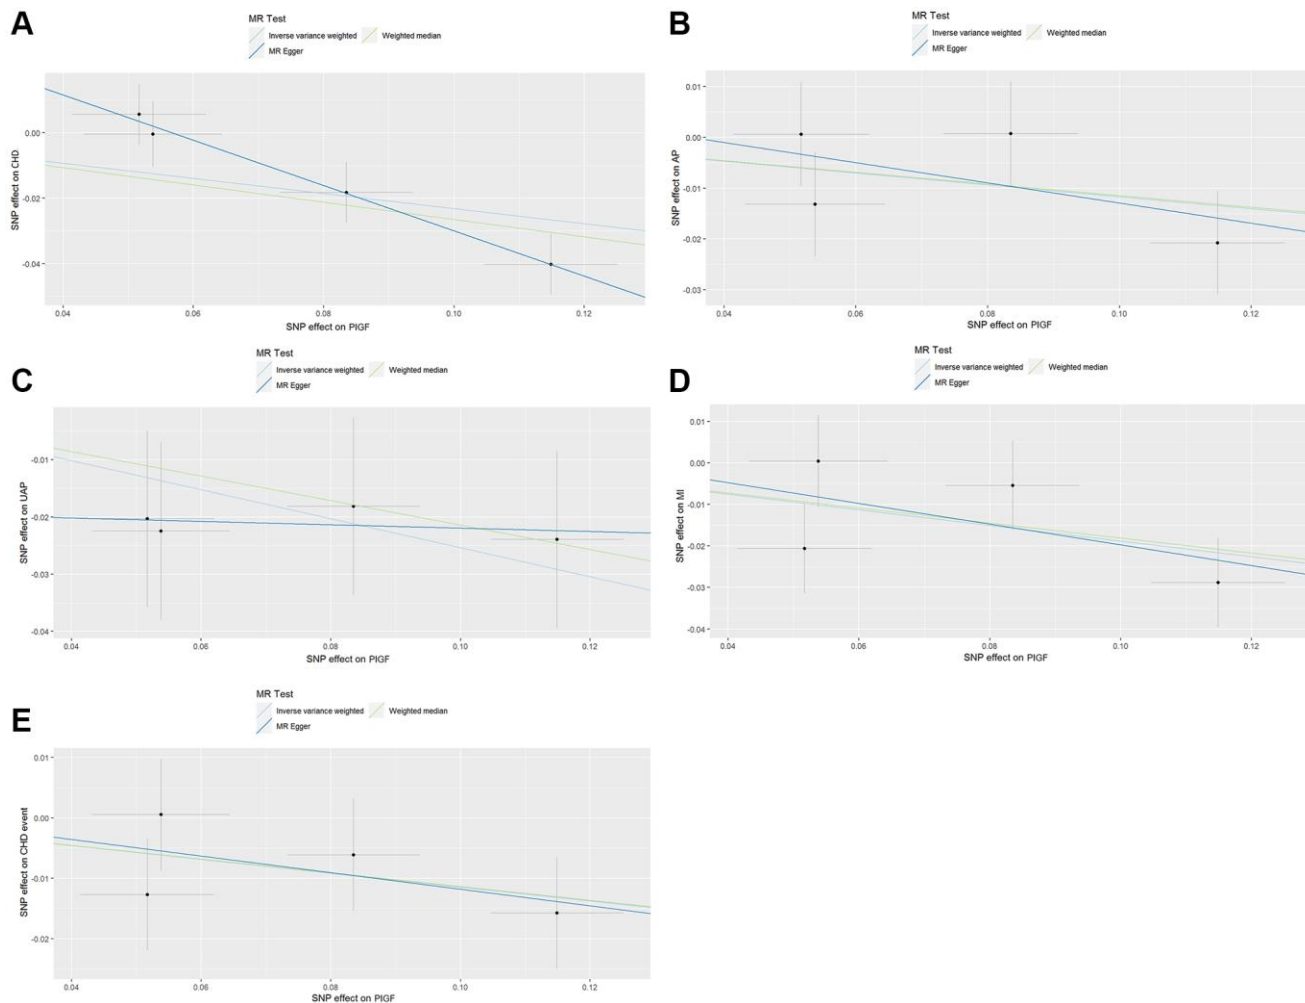

**Supplementary Figure 1. Scatter plot for the effect of PIGF level on the risk of CHD. (A) CHD; (B) AP; (C) UAP; (D) MI; (E) CHD event. Abbreviations: CHD: coronary artery disease; AP: angina pectoris; UAP: unstable angina pectoris; MI: myocardial infarction.**

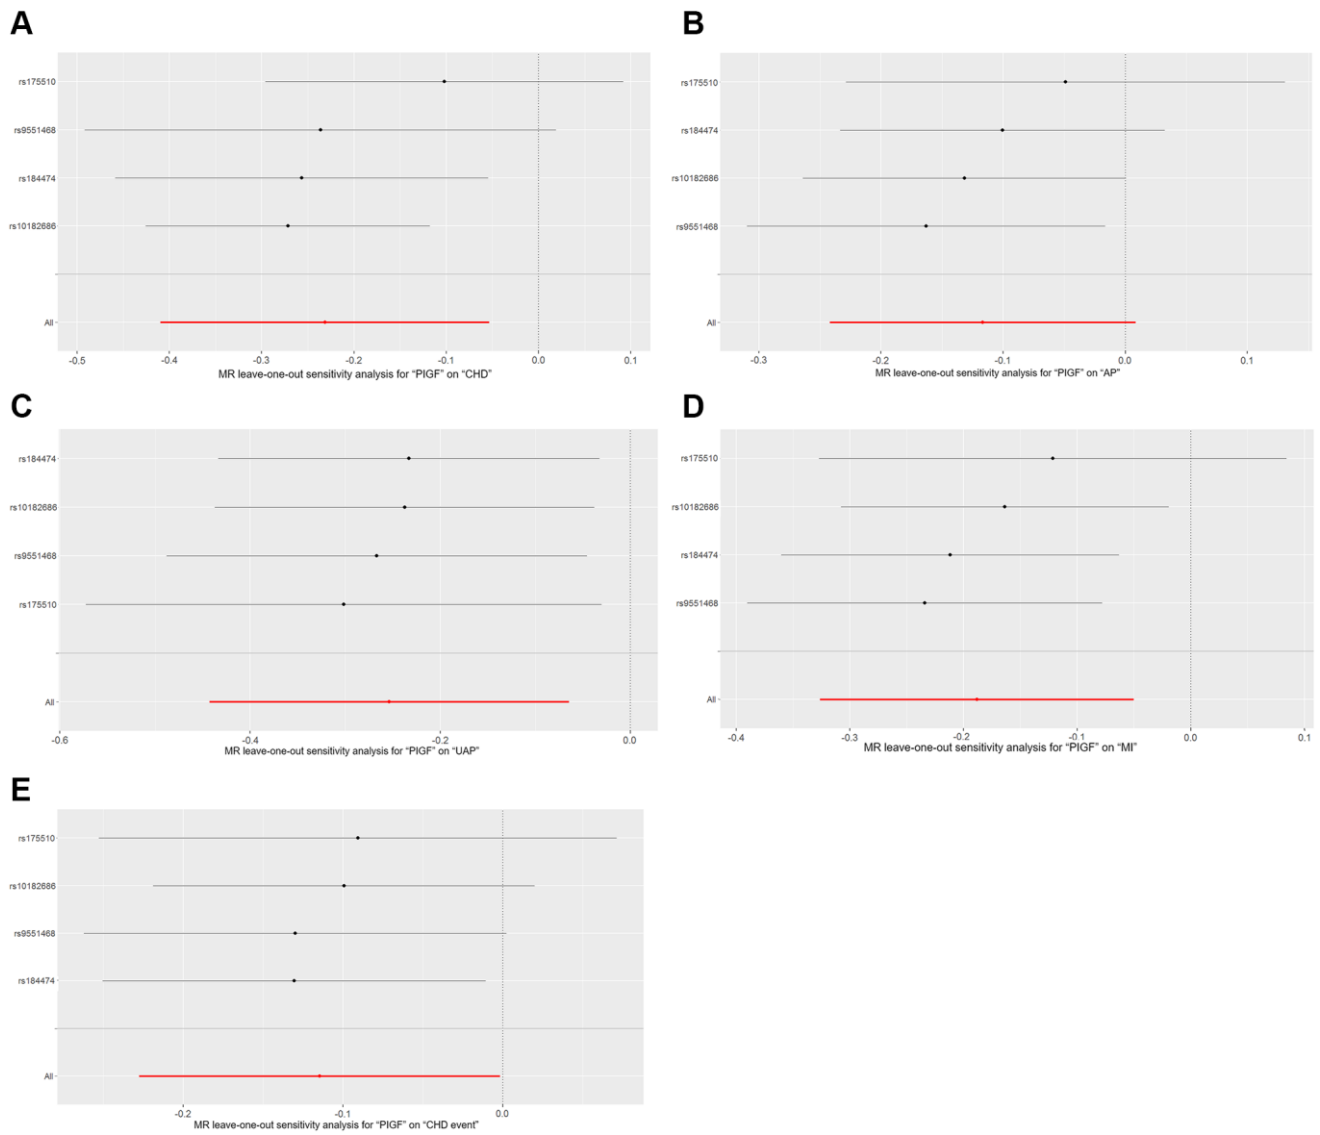

**Supplementary Figure 2. The leave-one-out test.** (A) CHD; (B) AP; (C) UAP; (D) MI; (E) CHD event. Abbreviations: CHD: coronary artery disease; AP: angina pectoris; UAP: unstable angina pectoris; MI: myocardial infarction.
