# Supplementary material for: Causal association between placental growth factor and coronary heart disease: a Mendelian randomization study
Source: PubMed Central journal article supplement (PMC10599727; doi:10.18632/aging.205061), 2023-10-02
Supplement: aging-15-205061-s002.pdf [file aging-15-205061-s002.pdf]

## SUPPLEMENTARY TABLES

**Supplementary Table 1. Exposure and outcome data after coordination.**

| PIGF-AP        |          |          |    |    |          |            |
|----------------|----------|----------|----|----|----------|------------|
| rsid           | effect   | SE       | a1 | a2 | a1_freq  | p-value    |
| rs184474       | -0.01317 | 0.010267 | G  | A  | 0.478912 | 0.199607   |
| rs10182686     | -0.00063 | 0.010258 | G  | A  | 0.457345 | 0.950928   |
| rs9551468      | 0.000754 | 0.010283 | G  | C  | 0.461056 | 0.941542   |
| rs175510       | -0.02075 | 0.01024  | A  | G  | 0.461012 | 0.0426982  |
| PIGF-CHD event |          |          |    |    |          |            |
| rsid           | effect   | SE       | a1 | a2 | a1_freq  | p-value    |
| rs184474       | 0.00057  | 0.009242 | G  | A  | 0.479093 | 0.950788   |
| rs10182686     | 0.012701 | 0.009245 | G  | A  | 0.457664 | 0.169485   |
| rs9551468      | -0.00612 | 0.009267 | G  | C  | 0.461014 | 0.50885    |
| rs175510       | -0.01577 | 0.009238 | A  | G  | 0.460982 | 0.0878942  |
| PIGF-UAP       |          |          |    |    |          |            |
| rsid           | effect   | SE       | a1 | a2 | a1_freq  | p-value    |
| rs184474       | -0.02248 | 0.01549  | G  | A  | 0.478905 | 0.146675   |
| rs10182686     | 0.020331 | 0.015468 | G  | A  | 0.457386 | 0.188718   |
| rs9551468      | -0.01819 | 0.015503 | G  | C  | 0.460944 | 0.240767   |
| rs175510       | -0.02396 | 0.015438 | A  | G  | 0.461244 | 0.120733   |
| PIGF-MI        |          |          |    |    |          |            |
| rsid           | effect   | SE       | a1 | a2 | a1_freq  | p-value    |
| rs184474       | 0.000392 | 0.011052 | G  | A  | 0.391746 | 0.97       |
| rs10182686     | 0.020606 | 0.010768 | G  | A  | 0.467835 | 0.0560003  |
| rs9551468      | -0.00547 | 0.010791 | G  | C  | 0.53063  | 0.61       |
| rs175510       | -0.02884 | 0.01078  | A  | G  | 0.468535 | 0.00749998 |
| PIGF-CHD       |          |          |    |    |          |            |
| rsid           | effect   | SE       | a1 | a2 | a1_freq  | p-value    |
| rs175510       | -0.04026 | 0.009342 | A  | G  | 0.439054 | 1.64E-05   |
| rs9551468      | -0.01826 | 0.009388 | G  | C  | 0.513064 | 0.0517095  |
| rs184474       | -0.00037 | 0.009969 | G  | A  | 0.363761 | 0.970553   |
| rs10182686     | -0.00571 | 0.00937  | G  | A  | 0.430795 | 0.542558   |

**Supplementary Table 2. Instrument strength of individual genetic variants.**

|                                          | F-statistics of individual SNP | R <sup>2</sup> of individual SNP |
|------------------------------------------|--------------------------------|----------------------------------|
| Mean F statistics and Sum R <sup>2</sup> | 22                             | 1.28%                            |
| rs184474                                 | 8                              | 0.14%                            |
| rs10182686                               | 7                              | 0.13%                            |
| rs9551468                                | 19                             | 0.35%                            |
| rs175510                                 | 36                             | 0.66%                            |

**Supplementary Table 3. The definition of CHD event.**

| <b>Outcome</b>     | <b>ICD code</b>                                 |
|--------------------|-------------------------------------------------|
| Hospital discharge | ICD-10 — I20.0, I21, I22                        |
| Hospital discharge | ICD-9 — 410 4110                                |
| Hospital discharge | ICD-8 — 410 4110                                |
| Cause of death     | ICD-10 — I21, I22, I23, I24, I25, I46, R96, R98 |
| Cause of death     | ICD-9 — 41 (0-4)  798                           |
| Cause of death     | ICD-8 — 41 (0-4)  798                           |
| Cause of death     | excluded ICD-9 — 7980A                          |
